# Supplementary material for: MAK33 antibody light chain amyloid fibrils are similar to oligomeric precursors
Source: PubMed Central journal article supplement (PMC5528828; doi:10.1371/journal.pone.0181799), 2017-07-26
Supplement: pone.0181799.s002.pdf [file pone.0181799.s002.pdf]

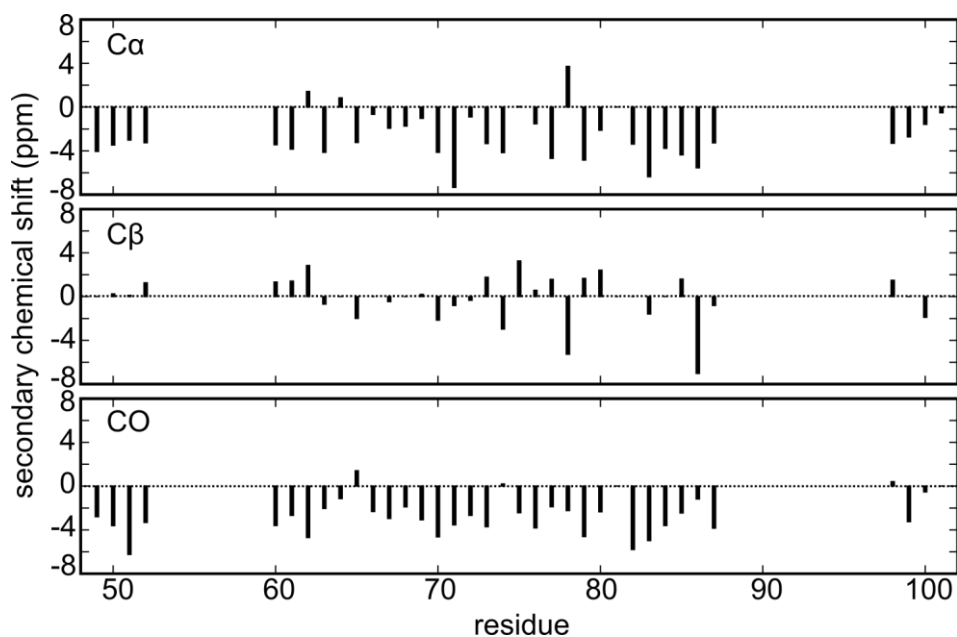

**S2 Fig. Secondary chemical shifts of MAK33 V<sub>L</sub> S20N fibrils.**

The panels display the differences between observed and random coil chemical shifts for C $\alpha$ , C $\beta$  and CO. Negative C $\alpha$  and CO secondary chemical shifts as well as positive C $\beta$  secondary chemical shifts are characteristic for  $\beta$ -strands [1,2].

**References:**

1. Wishart DS, Sykes BD, Richards FM. Relationship between nuclear magnetic resonance chemical shift and protein secondary structure. *J Mol Biol.* 1991;222(2):311–33.
2. Spera S, Bax A. Empirical Correlation between Protein Backbone Conformation and C $\alpha$  and C $\beta$  <sup>13</sup>C Nuclear Magnetic Resonance Chemical Shifts. *J Am Chem Soc.* 1991;113(14):5490–2.
